# Supplementary material for: Effect of Two Intensive Statin Regimens on Progression of Coronary Disease
Source: Atypon-hosted journal article supplement (doi:10.1056/nejmoa1110874), 2011-11-16
Supplement: nejmoa1110874_appendix.pdf [file nejmoa1110874_appendix.pdf]

## Supplementary Appendix

This appendix has been provided by the authors to give readers additional information about their work.

Supplement to: Nicholls SJ, Ballantyne CM, Barter PJ, et al. Effects of two intensive statin regimens on progression of coronary disease. *N Engl J Med* 2011. DOI: 10.1056/NEJMoa1110874.

## Online Supplement

1. Definition of previous intensive lipid modifying therapy .....2
2. List of participating investigators .....3
3. Relationship between LDL-C and PAV progression in IVUS trials .....7

**Prior Intensive Lipid Modifying Therapy**

Patients must not have been treated with the following lipid-modifying medications for more than 3 months in the last year prior to enrollment

- Rosuvastatin, any dose
- Atorvastatin, 40 mg or 80 mg
- Simvastatin 80 mg
- Simvastatin/ezetimibe, any dose
- Ezetimibe in combination with any statin
- Fibrates, any dose
- Niacin/nicotinic acid, 250 mg or more
- Omega-3 fatty acids, 1000 mg or more

## Participating Investigators for SATURN

**Australia:** Queensland:Cardiology Clinical Research Centre, Chermside (D. Walters, MD); South Australia: Cardiovascular Clinical Trials, Adelaide (M. Worthley, MD); New South Wales: Cardiology Research Team, New Lambton Heights (G. Bellamy, MD); NSW Department of Cardiology, Liverpool (C. Juergens, MD); Western Australia: Cardiology Research, Perth (J. Rankin, MD). **Argentina:** Hospital Italiano,Buenos Aires (A.Fernandez, MD); Hospital Britanico, Buenos Aires (C. Majul, MD); Sanatorio Guemes, Buenos Aires (M. Bettinoti, MD); Instituto Dupuytren, Buenos Aires (P. Kantor, MD); Sanatorio de la Trinidad Mitre, Buenos Aires (G. Marchetti, MD); Instituto Cardiovascular de Buenos Aires, Buenos Aires (L. Padilla, MD); Instituto Médico de Alta Complejidad, Buenos Aires (C. Szejfman, MD); Instituto de Diagnóstico, La Plata (D. Grinfeld, MD); ClinicaChutro S.R.L, Córdoba (H. Jure, MD); Sanatorio Parque Privado, Córdoba (H. Luquez, MD); Hospital Privado de Córdoba, Córdoba (M. Amuchastegui, MD); CBA Fundación Rusculleda, Córdoba (A. Lorenzatti, MD); Sanatorio Allende Hipolito, Córdoba (E.Moreyra, MD); Instituto de Cardiología de Corrientes, Corrientes (J.Baccaro, MD); Instituto Cardiovascular de Rosario, Rosario (A. Damonte, MD). **Belgium:** UCL Saint Luc, Brussels (J. Renkin, Prof); CHU Charleroi, Charleroi (J. Lalmand, MD); Sint Jan Hospital, Brugge (L. Missault, MD); Ziekenhuis Oost Limburg, Genk (M. Vrolix, MD); Onze Lieve Vrouw Ziekenhuis, Aalst (E. Barbato, MD); Clinique StAnne St Remi, Bruxelles (M. Goldstein, MD); UZ Leuven, Leuven (T. Adriaenssens, MD). **Brazil:** Espitito Santo:Centro Integrado de Atenção a Saúde UNIMED,Vitória (J. Arruda, MD); Intercath Hospital Meridional, Cariacica, (B. Machado, MD); Goias: Via Médica Centro Clínico, Goiânia (W. Souza, MD); Minas Gerais:Instituto do Coração do Triângulo Mineiro, Uberlândia (R. Botelho, MD); Mato Grosso: Hospital Geral Universitário, Cuiaba (J. Sejopoles, MD); Parana: Hospital Cardiológico Costantini, Curitiba (C. Costantini, MD); Instituto Dante Pazzanese de Cardiologia, São Paulo (A. Abizaid, MD); Hospital das Clínicas Da Faculdade Ribeirão Preto, Marin (J. Neto, MD). **Canada:** Alberta: University of Alberta Hospital , Edmonton (J. Burton, MD); Foothills Interventional Cardiology Servic, Calgary(M.Traboulsi, MD);Royal Alexandra Hospital, Edmonton (W.Hui, MD); British Columbia: Diamond Health Care Centre Vancouver(J. Saw, MD); Victoria Heart Institue Foundation, Victoria (A. Della Siega, MD); St. Paul's Hospital,Vancouver (E. Aymong, MD); Manitoba:St. Boniface General Hospital,Winnipeg (F. Hussain, MD); St. Boniface General Hospital, Winnipeg (J. Ducas, MD); New Brunswick: NB Heart Centre, Saint John (R. Teskey, MD); Nova Scotia: Queen Elizabeth II Health Sciences Centre, Halifax (L. Title, MD); Ontario: Sunnybrook Health Sciences Centre, Toronto (E. Cohen, MD); University of Ottawa Heart Institute, Ottawa (M. Le May, MD); London Health Sciences Centre, London (P. Diamantouros, MD); Hamilton General Hospital, Hamilton (M. Rokoss, MD); York PCI Group, Newmarket(S. Miner, MD); University Health Network, Toronto (C. Overgaard, MD); St. Michael's Hospital, Toronto (M. Kutryk, MD); Quebec: Hospital Maisonneuve-Rosemont, Montreal (C. Constance, MD); Hôtel-Dieu de Montréal-CHUM, Montreal (S. Mansour, MD); Hôpital Laval, Quebec (J. Rodes Cabau, MD); Hopital du Sacre-coeur de Montreal, Montreal (E. Schampaert, MD); Institut de Cardiologie de Montreal, Montreal(J. Tardif, MD); Royal Victoria Hospital MUHC, Montreal (G. Martucci, MD); CSSS de Chicoutimi, Chicoutimi (T. Cieza, MD); Cite de la Sante de Laval, Laval(R. Gendreau, MD); Saskatchewan:Royal University Hospital, Saskatoon (C. Pearce, MD). **France:** Hôpital Cardiologique du Haut Leveque, Pessac Cedex (P. Coste, MD); Centre Chirurgical Marie Lannelongue, Le Plessis-Robinson (C. Caussin, MD); Hôpital Cardiologique Louis Pradel, Bron (G. Finet, MD); Hôpital Henri Mondor, Creteil (E. Teiger, MD); CHU de Rangueil, Toulouse Cedex (M. Elbaz, MD); Hôpital Claude Galien, Quincy sous Sénart (P. Garot, MD); Hôpital de la Timone, Marseille (J. Bonnet, MD); Hôpital Jean Minjoz, Besançon (F. Schiele, MD); Nouvel Hôpital Civil,

Strasbourg (P. Ohlmann, MD). **Hungary:** Semmelweis Egyetem, Budapest (M. Béla, MD); Budai Irgalmasrendi Kórház, Budapest (Z. András, MD); Szegedi Tudományegyetem, Szeged (U. Imre, MD). **Italy:** Ospedale San Giovanni Addolorata, Roma (F. Prati, MD); Ospedale San Raffaele, Milano (A. Colombo, MD); Ospedale S. Maria della Misericordia, Udine (G. Bernardi, MD); Istituto Clinico Humanitas, Rozzano (P. Presbitero, MD); Azienda Ospedaliera senese, Siena (M. Fineschi, MD); Azienda Ospedaliera Maggiore della carita, Novara (G. De Luca, MD); A.O. Parma, Parma (L. Vignali, MD); Ospedale San Donato, Arezzo (L. Bolognese, MD); Multimedita IRCCS, Sesto San Giovanni (F. Airoidi, MD). **Mexico:** Hospital Cardiologica Aguascaliente, Aguascalientes (G. Llamas Esperon, MD); Instituto Del Corazon De Queretaro, Querétaro (M. Alcocer Gamba, MD); Instituto Cardiovascular De Tijuana, Tijuana (H. Soto Espinoza, MD); Hospital Angeles De Puebla, Puebla (J. de Zatarin Rivero, MD); Hospital Bernardette, S.A. De C.v. Guadalaj, Guadalajara (F. Padilla, MD); Hospital de Cardiologia, Monterrey (A. Garcia, MD); Instituto Nacional de Ciencias Medicas y Nutricion Slabador Zubiran, Distrito Federal (J. Dorantes, MD). **Netherlands:** Amphia Ziekenhuis, Breda (J. Vos, MD); Isala klinieken, Zwolle (M. Gosselink, MD.); Medisch Spectrum Twente, Enschede (C. von Birgelen, MD); Onze Lieve Vrouwe Gasthuis, Amsterdam (J.P.R. Herrman, MD); St Antonius Ziekenhuis, Nieuwegein (B.J.W.M. Rensing, MD); Erasmus Medisch Centrum I.C. H-gebouw, Rotterdam (R.J.M. van Geuns, MD); UMC St Radboud, Nijmegen (H. Gehlmann, MD.); MCL, Heart Centre, Leeuwarden (A.J. van Boven, MD); Catharina Ziekenhuis, Eindhoven (C.J. Botman, MD); Medisch Centrum Alkmaar, Alkmaar (R.W.M. Hautvast, MD). **Poland:** Samodzielna Pracownia, Warszawa (A. Witkowski, MD); Samodzielny Publiczny Zakład Opieki, Lodz (M. Kosmider, MD); Samodzielny Publiczny Szpital Kliniczny nr, Katowice (A. Ochala, MD); Samodzielna Pracownia Hemodynamiki I, Kraków (D. Dudek, MD); Centralna Pracownia Diagnostyki Naczyniowej, Poznan (M. Dziarmaga, MD); Klinika Kardiologii Inwazyjnej Samodzielny, Bialystok (S. Dobrzycki, MD) Uniwersytet Medyczny w Lodzi I Katedra Kardiologii, Łódź (A. Lubinski, MD); Pracownia Serca i Naczyn Zakład, Poznan (J. Rzezniczak, MD); Krakowski Szpital Specjalistyczny im., Krakow (K. Zmudka, Prof); Samodzielny Publiczny Szpital Kliniczny Nr 7, Katowice (G. Smolka, MD); NZOZ Polsko-Amerykanske Kliniki Serca, Kedzierzyn Kozle (J. Prokopczuk, MD); Slaskie Centrum Chorób Serca, Zabrze (M. Gasior, MD ); Slaskie Centrum Chorób Sercal, Zabrze (Z. Kalarus, MD); Pracownia Kardiologii Inwazyjnej i Naczyniowa, Poznan (R. Kasinowski, MD). **Russia:** Federal State Institution Russian Cardiology, Moscow (V. Kukharchuk, MD); Russian Cardiology Research-and-Production, Moscow (S. Boytsov, MD); Federal State Institution Russian Cardiology, Moscow (F. T. Ageev, MD); 3CMCH, Moscow (V. Ivanov, MD); Russian Scientific Surgery Center RAMS, Moscow (S. Abugov, MD); Moscow City Centre of Interventional, Moscow (D. Loseliani, MD); Saint-Petersburg State Medical institution, Saint-Petersburg (L. Shcheglova, MD); Institute of Cardiology, Tomsk (O. Koshelskaya, MD); Bakoulev Scientific Center, Moscow (S. Matskeplishvili, MD); Tumen Regional Clinical Hospital, Tumen (S. Shalaev, MD). **Spain:** Hospital Vall d'Hebron, Barcelona (J. Angel Ferrer, MD); Hospital Clinico de Malaga, Malaga (J. Maria Hernandez, MD); Hospital de Bellvitge, Barcelona (A. Cequier, MD); Hospital del Mar, Barcelona (A. Serra, MD); Hospital General de Alicante, Alicante (J. Miguel Ruiz Nodar, MD); Hospital Central de Asturias, Asturias (I. Lozano, MD ); Hospital Clinico San Carlos, Madrid (C. Macaya, MD); Hospital German Trias I Pujols., Barcelona (J. Mauri Ferre, MD). **United States:** Alabama: Heart Center Research LLC, Huntsville (A. Vasquez, MD); California: Los Angeles Biomedical Research, Torrance (M. Budoff, MD); Radiant Research Inc, Santa Rosa (S. Halpern, MD); FACT, Los Angeles (G. Mayeda, MD); VA San Diego Healthcare System, San Diego (W. Penny, MD); Colorado: CardioVascular Institute of North Colorado, Greeley (J. Beckmann, MD); Medical Center of the Rockies Foundation, Loveland (T. Downes, MD); Boulder Medical Centre/Reserch, Boulder (M. Holland, MD); Connecticut: UCONN Health Center, Farmington (M. Azrin, MD);

District of Columbia: Washington Hospital, Washington (R.Waksman, MD); Florida: Broward General Medical Center, Ft. Lauderdale (V. Atanasoski-McCormick, MD); Winter Haven Hospital Winter haven (F. Belal, MD); The Heart & Vascular Institute of Florida, Clearwater (P. Cambier, MD); Sarasota Memorial Clinical Research Center, Sarasota (S. Culp, MD); Miami International Cardiology Consultants, Miami (J. Margolis, MD); Florida Cardiovascular Associates, Tampa (F. Matar, MD); Orlando Heart Center (Orlando (M. Steiner, MD); MIMA Gateway, Melbourne (R. Vicari, MD); Georgia: Piedmont Hospital, Atlanta (A. Kalynych, MD); Saint Joseph's Research Institute, Atlanta (M. Lipsett, MD); Emory University Hospital, Atlanta (H. Samady, MD); Augusta Cardiology Clinic PC, Augusta (G. Walters, MD); Iowa: University of Iowa Hospitals and Clinics, Iowa City (P. Horwitz, MD); Indiana: Cardiology Associates of Northwest Indiana P.C., Hammond (R. Bhagwat, MD); Cardiovascular Clinic, Merrillville (T. Nguyen, MD); The Care Group Indianapolis (K. Parr, MD); Midwest Cardiovascular, Elkhart (D. Westehausen, MD); Kentucky: University of Louisville, Louisville (R. Coram, MD); Norton Cardiovascular Associates, Louisville (V. DeGeare, MD); Kentucky Heart Institute, Ashland (C. Epling, MD); UK Gill Heart Institute, Lexington (K. Ziada, MD); Louisiana: TCA Research LLC, Covington (G. Lasala, MD); MD: Cardiovascular Specialists LLC, Columbia (W. Herzog, MD); Suburban Hospital, Bethesda (E. Lieberman, MD); Washington Adventist Hospital, Takoma Park (M. Turco, MD); Michigan: Cardiac & Vascular Res. Ctr. Of N. Michigan, Petoskey (L. Cannon, MD); Providence Hospital & Medical Centers, Southfield (S. David, MD); Genesys Regional Medical Center, Grand Blanc (D. Dobies, MD); MCVI Mid-Michigan Medical Center, Midland (W. Felten, MD); Michigan Cardiovascular Institute, Saginaw (R. Gudipati, MD); Mercy Health Partners, Muskegon (M. Meengs, MD); Minnesota: United Heart and Vascular Clinic, St. Paul (K. Baran, MD); MetroCardiology Consultant Mercy Hospital, Minneapolis (J. Chambers, MD); St. Mary's Med. Center, Duluth (A. Chiu, MD); Saint Marys Hospital Mayo Clinic Rochester R. Gulati, MD); Missouri: Kansas City Heart Foundation, Kansas City (E. Hochtstad, MD); University of Missouri Health Care, Columbia (R. Webel, MD); North Carolina: LeBauer Cardiovascular Research Foundation, Greensboro (M. Cooper, MD); Mid Carolina Cardiology, Charlotte (M. Miller, MD); North Dakota: Sanford Health, Fargo (T. Haldis, MD); Nebraska: BryanLGH Heart Institute, Lincoln (R. Whitney, MD); New Jersey: UMDNJ-Robert Wood Johnson Medical School, New Brunswick (A. Moreyra, MD); The Valley Hospital, Ridgewood (J. Strain, MD); New York: Buffalo Cardiology & Pulmonary Associates PC, Williamsville (J. Corbelli, MD); United Health Services Office of Clinical Trials, Johnson City (H. Kashou, MD); Buffalo Heart Group, Buffalo (A. Masud, MD); St. Francis Hospital, Roslyn (R. Schlofmitz, MD); Gotham Cardiovascular Research PC, New York (C. Staniloa, MD); Ohio: University of Toledo Medical Center, Toledo (W. Colyer, MD); MetroHealth Medical Center, Cleveland (S. Gandhi, MD); Southwest General Health Center Middleburg Heights J. Khatri, MD); University of Cincinnati, Cincinnati (M. Leesar, MD); North Ohio Research, Elyria (C. O'Shaughnessy, MD); The Cleveland Clinic Foundation, Cleveland (R. Raymond, MD); MidWest Cardiology Research Foundation, Columbus (S. Yakubov, MD); Oklahoma: Oklahoma Heart Institute, Tulsa (W. Leimbach, MD); Integris Cardiology Southwest, Oklahoma City M. Yassin, MD); Oregon: Endovascular Research, Springfield (S. Cook, MD); Hillsboro Cardiology PC, Hillsboro (S. Promisloff, MD); St. Charles Health System, Bend (J. Wollmuth, MD); Pennsylvania: Geisinger Clinic, Danville (J. Blankenship, MD); Penn State MH Hershey Medical Center, Hershey (I. Gilchrist, MD); Penn Presbyterian Medical Center Philadelphia (R. Li, MD); Doylestown Hospital, Doylestown (J. McGarvey, MD); South Carolina: Medical University of South Carolina, Charleston (D. Steinberg, MD); Tennessee: Baptist Hospital West, Knoxville (M. Foster, MD); Chattanooga Heart Institute, Chattanooga (S. Ledford, MD); Stern Cardiovascular Center, Germantown (F. McGrew, MD); VAMC, Memphis (K. Ramanathan, MD); Texas: VA North Texas Health Care System, Dallas (E. Brilakis, MD);

University of Texas HSC, San Antonio (M. Feldman, MD); Virginia: UVA Health System, Charlottesville (M. Ragosta, MD); Washington: Hope Heart Institute Bellevue R. Aviles, MD); Spokane Cardiology, Spokane (P. Huber, MD).

## Online Figure.

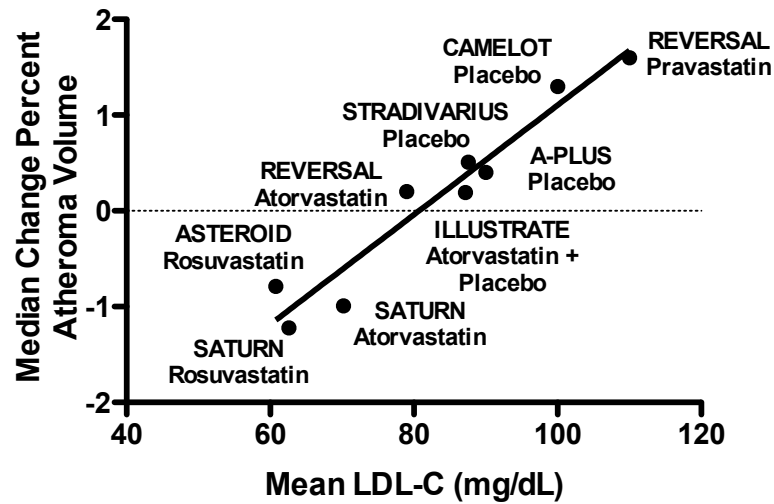

Online Figure. Relationship between achieved levels of low-density lipoprotein cholesterol (LDL-C) and median change in percent atheroma volume in trials that have employed serial intravascular ultrasound to measure changes in atheroma burden.
